# Supplementary material for: Gaussian Process regression model for dynamically calibrating a wireless low-cost particulate matter sensor network in Delhi
Source: Copernicus journal article supplement (doi:10.5194/amt-2019-55), 2019-03-01
Supplement: Supplementary file 1 [file amt-2019-55-supplement.pdf]

## Reasoning behind step four of the schema for the simultaneous GPR and simple linear regression calibration model

Once the optimum  $\Theta$  for the (initial) GPR was found, we used the learned covariance function to find the mean of each low-cost node  $i$ 's Gaussian Distribution conditional on the remaining 30 nodes within the network (i.e.,  $\mu_{A|B}^{it}$ ) on day  $t$  as described mathematically in Eq. (S1)–(S4) and repeatedly did so until all 59 days'  $\mu_{A|B}^{it}$  (i.e.,  $\mu_{A|B}^i$ ) were found and then recalibrated that low-cost node  $i$  based on the  $\mu_{A|B}^i$ . This procedure was performed iteratively for all low-cost nodes one at a time.

$$p\left(\begin{bmatrix} r_A^{it} \\ r_B^{it} \end{bmatrix}\right) = N\left(\begin{bmatrix} r_A^{it} \\ r_B^{it} \end{bmatrix}; \begin{bmatrix} \mu_A^{it} \\ \mu_B^{it} \end{bmatrix}, \begin{bmatrix} \Sigma_{AA}^{it} & \Sigma_{AB}^{it} \\ \Sigma_{BA}^{it} & \Sigma_{BB}^{it} \end{bmatrix}\right) \quad (\text{S1})$$

$$r_A^{it} | r_B^{it} \sim N(\mu_{A|B}^{it}, \Sigma_{A|B}^{it}) \quad (\text{S2})$$

$$\mu_{A|B}^{it} = \mu_A^{it} + \Sigma_{AB}^{it} \Sigma_{BB}^{it}{}^{-1} (r_B^{it} - \mu_B^{it}) \quad (\text{S3})$$

$$\Sigma_{A|B}^{it} = \Sigma_{AA}^{it} - \Sigma_{AB}^{it} \Sigma_{BB}^{it}{}^{-1} \Sigma_{BA}^{it} = a \text{ constant for low - cost node } i \text{ regardless of day } t = \Sigma_{A|B}^i \quad (\text{S4})$$

where  $r_A^{it}$  and  $r_B^{it}$  are the daily PM<sub>2.5</sub> measurement(s) of the low-cost node  $i$  and the remaining 30 nodes on day  $t$ ;  $\mu_A^{it}$ ,  $\mu_B^{it}$ , and  $\mu_{A|B}^{it}$  are the mean (**vector**) of the partitioned Multivariate Gaussian Distribution of the low-cost node  $i$ , the remaining 30 nodes, and the low-cost node  $i$  conditional on the remaining 30 nodes, respectively, on day  $t$ ; and  $\Sigma_{AA}^{it}$ ,  $\Sigma_{AB}^{it}$ ,  $\Sigma_{BA}^{it}$ ,  $\Sigma_{BB}^{it}$ , and  $\Sigma_{A|B}^{it}$  are the covariance between the low-cost node  $i$  and itself, the low-cost node  $i$  and the remaining 30 nodes, the remaining 30 nodes and the low-cost node  $i$ , the remaining 30 nodes and themselves, and the low-cost node  $i$  conditional on the remaining 30 nodes and itself, respectively, on day  $t$ .

The reasoning behind recalibrating each low-cost node  $i$  based on the  $\mu_{A|B}^i$  is given as follows:

The conditional log-likelihood under the Univariate Gaussian distribution on day  $t$  is:

$$\log p(r_A^{it} | r_B^{it}) = \text{constant} - 0.5 \Sigma_{A|B}^{it}{}^{-2} (r_A^{it} - \mu_{A|B}^{it})^2 \quad (\text{S5})$$

Then the complete log-likelihood over all 59 days is therefore given by:

$$\sum_{t=1}^{59} \log p(r_A^{it} | r_B^{it}) = \text{constant} - \text{positive constant} \cdot \sum_{t=1}^{59} (r_A^{it} - \mu_{A|B}^{it})^2 \quad (\text{S6})$$

The objective is to maximize the complete log-likelihood over all 59 days (i.e., S6), that is equivalent to minimizing the term

of  $\sum_{t=1}^{59} (r_A^{it} - \mu_{A|B}^{it})^2$ :

$$\max_{r_A^i} \sum_{t=1}^{59} \log p(r_A^{it} | r_B^{it}) = \min_{r_A^i} \|r_A^i - \mu_{A|B}^i\|_2^2 \quad (\text{S7})$$

$$\text{and } r_A^i = Y_i \beta_i \quad (\text{S8})$$

where  $\mathbf{Y}_i = \begin{bmatrix} 1 & y_{it} \\ \vdots & \vdots \\ 1 & y_{i59} \end{bmatrix}$  and  $\boldsymbol{\beta}_i$  is a vector of the intercept and slope (to be learned) of the simple linear regression calibration equation for low cost node  $i$ .

And to minimize  $\|\mathbf{Y}_i \boldsymbol{\beta}_i - \boldsymbol{\mu}_{A|B}^i\|_2^2$  is then equivalent to optimizing a simple linear regression model to re-calibrate the raw  
5 low-cost node signals based on the mean of each node's Gaussian Distribution conditional on the remaining 30 nodes within the network (i.e.,  $\boldsymbol{\mu}_{A|B}^i$ ).

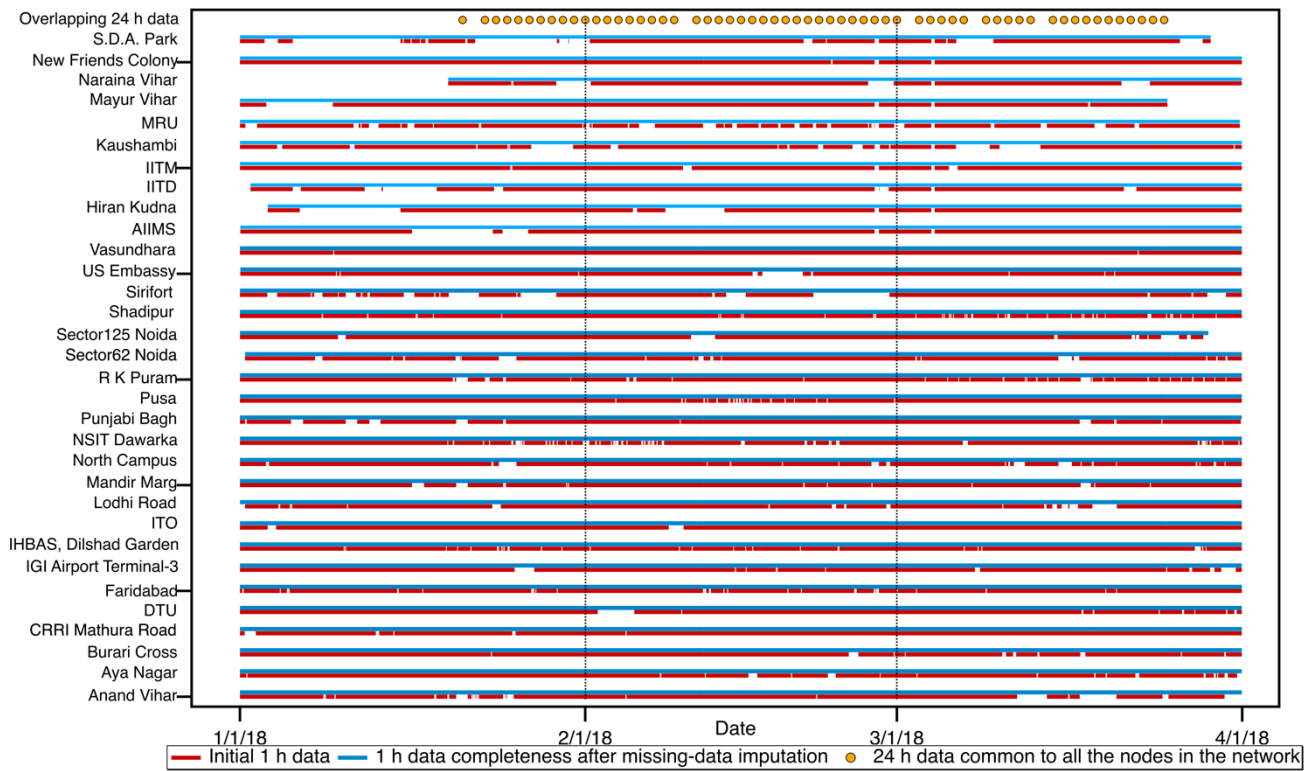

**Figure S1: Periods over which 1 h data were available for each individual site before and after missing-data imputation and a total of 59 24 h aggregated observations common to all the nodes in the network used for the on-the-fly calibration feasibility test.**

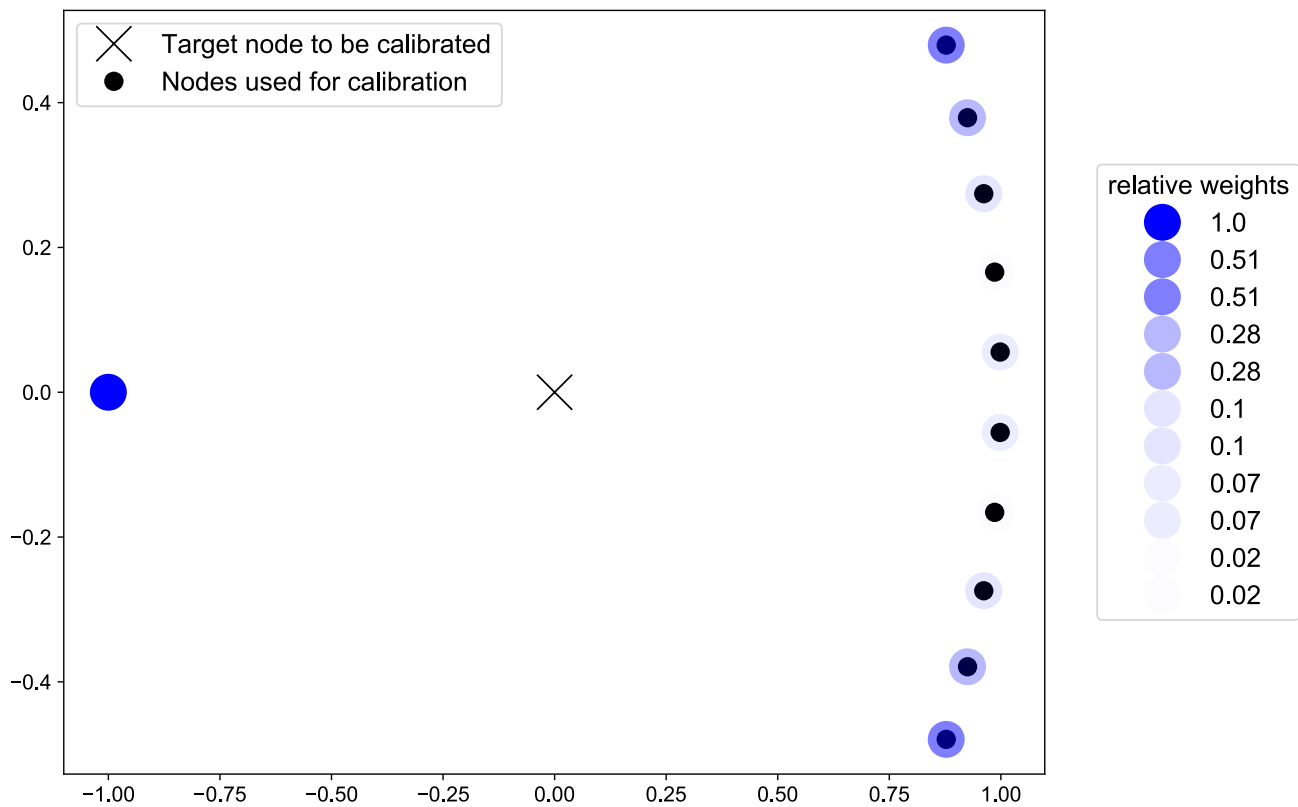

**Figure S2: Simplified illustration of the relative importance (i.e., importance normalized by the max value) of each node within the network when using GPR to calibrate the target low-cost node and when all the nodes used for calibration are equally distant from the target node.**

5

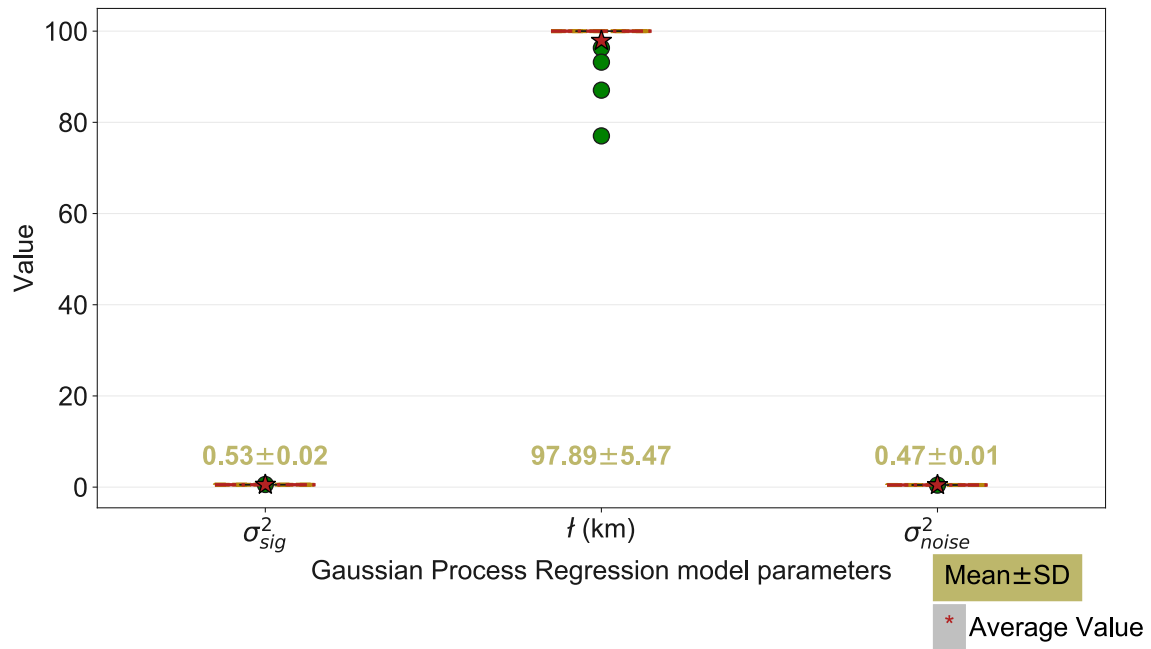

**Figure S3: Box plots of the learned optimum Gaussian Process Regression model parameters including the signal variance ( $\sigma_{sig}^2$ ), the characteristic length scale ( $l$ ), and the noise variance ( $\sigma_{noise}^2$ ) from the 22-fold leave-one-out cross-validation. The mean and SD of each parameter are superimposed on the box plots.**

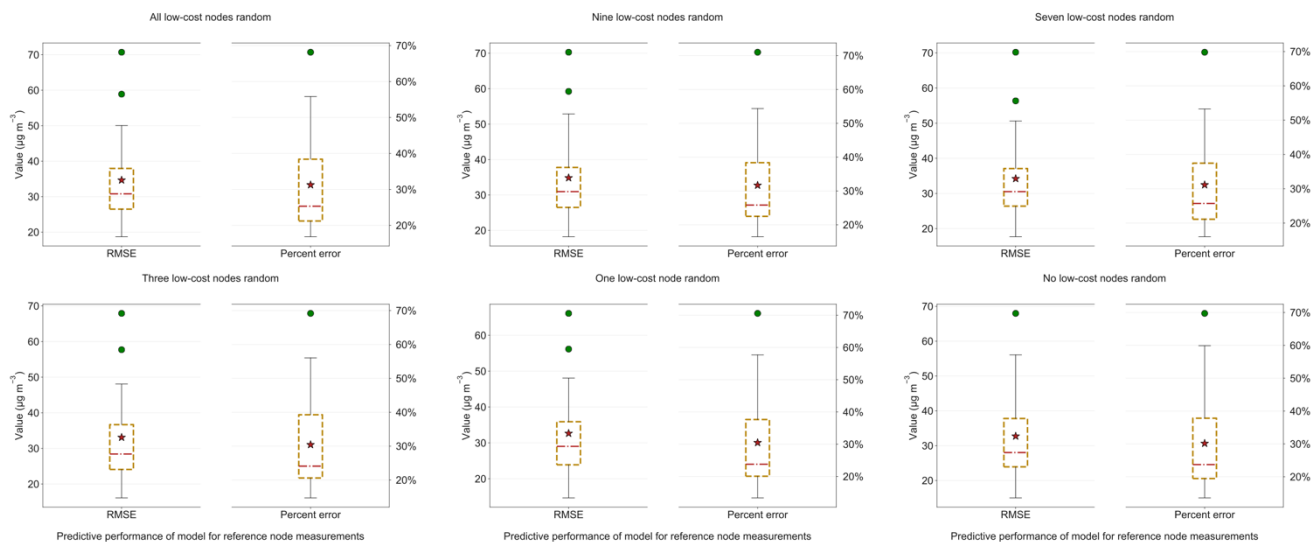

5 **Figure S4: Gaussian Process Regression model 24 h performance scores (including RMSE and percent error) for predicting the measurements of the 22 holdout reference nodes across the 22-fold leave-one-out cross-validation using the full sensor network, when measurements of all (top left), nine (top center), seven (top right), three (bottom left), one (bottom center), and zero (bottom right) of the low-cost nodes are replaced with random integers bounded by the min and max of the true signals reported by the corresponding low-cost nodes.**

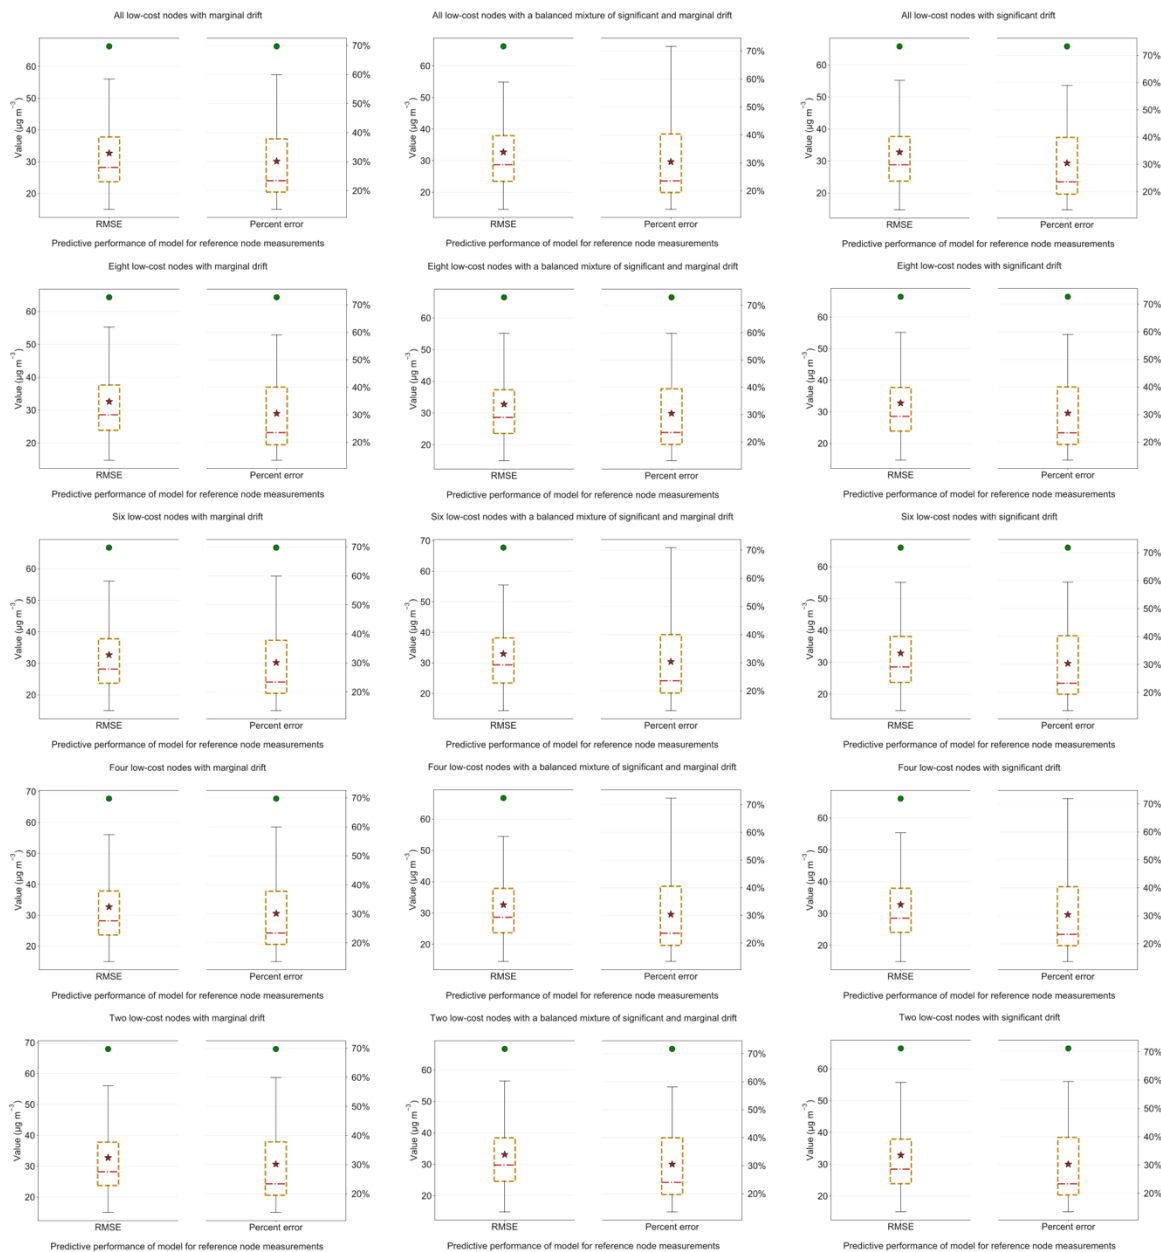

**Figure S5: Gaussian Process Regression model 24 h performance scores (including RMSE and percent error) for predicting the measurements of the 22 holdout reference nodes across the 22-fold leave-one-out cross-validation using the full sensor network, when measurements of two (bottom/1<sup>st</sup> row), four (2<sup>nd</sup> row), six (3<sup>rd</sup> row), eight (4<sup>th</sup> row), and all ten (top/5<sup>th</sup> row) of the low-cost nodes developed significant (11 %–99 %, left column), marginal (1 %–10 %, right column), and a balanced mixture of significant and marginal drifts. Note the sensors that drifted, the percentages of drift, and which sensors drifted significantly or marginally are randomly chosen. The results reported under each scenario are based on averages of 10 simulation runs.**

5 **Table S1: Comparison of pre-determined percentages of drift to those estimated from the Gaussian Process Regression model for intercept and slope, respectively, for each individual low-cost node, assuming eight and four of the low-cost nodes developed various degrees of drift such as significant (11 %–99 %), marginal (1 %–10 %), and a balanced mixture of significant and marginal. Note the sensors that drifted, the percentages of drift, and which sensors drifted significantly or marginally are randomly chosen. The results reported under each scenario are based on averages of 10 simulation runs.**

| Drift category                     | Low-cost nodes                  | Eight low-cost nodes drift |           |                 |           | Four low-cost nodes drift |           |                 |           |
|------------------------------------|---------------------------------|----------------------------|-----------|-----------------|-----------|---------------------------|-----------|-----------------|-----------|
|                                    |                                 | Intercept drift (%)        |           | Slope drift (%) |           | Intercept drift (%)       |           | Slope drift (%) |           |
|                                    |                                 | True                       | Estimated | True            | Estimated | True                      | Estimated | True            | Estimated |
| Significant                        | AIIMS                           | 55 %                       | 54 %      | 55 %            | 55 %      | 0 %                       | -2 %      | 0 %             | 0 %       |
|                                    | Hiran Kudna                     | 57 %                       | 43 %      | 54 %            | 56 %      | 47 %                      | 42 %      | 54 %            | 54 %      |
|                                    | IITD                            | 68 %                       | 70 %      | 61 %            | 61 %      | 0 %                       | -1 %      | 0 %             | -1 %      |
|                                    | IITM                            | 0 %                        | -2 %      | 0 %             | -1 %      | 0 %                       | -2 %      | 0 %             | -1 %      |
|                                    | Kaushambi                       | 0 %                        | -1 %      | 0 %             | -1 %      | 0 %                       | -1 %      | 0 %             | -1 %      |
|                                    | MRU                             | 45 %                       | 46 %      | 52 %            | 51 %      | 0 %                       | -4 %      | 0 %             | 1 %       |
|                                    | Mayur Vihar                     | 56 %                       | 59 %      | 48 %            | 47 %      | 42 %                      | 44 %      | 57 %            | 56 %      |
|                                    | Naraina Vihar                   | 63 %                       | 61 %      | 57 %            | 57 %      | 51 %                      | 51 %      | 48 %            | 48 %      |
|                                    | New Friends Colony              | 53 %                       | 53 %      | 57 %            | 57 %      | 70 %                      | 71 %      | 39 %            | 38 %      |
|                                    | S.D.A. Park                     | 55 %                       | 50 %      | 55 %            | 56 %      | 0 %                       | -4 %      | 0 %             | 2 %       |
|                                    | <b>Mean absolute difference</b> | <b>3 %</b>                 |           | <b>1 %</b>      |           | <b>2 %</b>                |           | <b>1 %</b>      |           |
| 50 % significant and 50 % marginal | AIIMS                           | 0 %                        | -1 %      | 0 %             | -1 %      | 0 %                       | -1 %      | 0 %             | -1 %      |
|                                    | Hiran Kudna                     | 47 %                       | 40 %      | 58 %            | 58 %      | 0 %                       | -9 %      | 0 %             | 3 %       |
|                                    | IITD                            | 57 %                       | 62 %      | 58 %            | 57 %      | 0 %                       | 0 %       | 0 %             | -2 %      |
|                                    | IITM                            | 6 %                        | 5 %       | 6 %             | 3 %       | 4 %                       | 3 %       | 7 %             | 6 %       |
|                                    | Kaushambi                       | 4 %                        | 4 %       | 5 %             | 1 %       | 0 %                       | 0 %       | 0 %             | -2 %      |
|                                    | MRU                             | 47 %                       | 54 %      | 55 %            | 53 %      | 0 %                       | -1 %      | 0 %             | -1 %      |
|                                    | Mayur Vihar                     | 56 %                       | 62 %      | 46 %            | 43 %      | 44 %                      | 48 %      | 70 %            | 68 %      |
|                                    | Naraina Vihar                   | 5 %                        | 3 %       | 4 %             | 3 %       | 58 %                      | 56 %      | 46 %            | 47 %      |
|                                    | New Friends Colony              | 6 %                        | 7 %       | 6 %             | 2 %       | 5 %                       | 6 %       | 6 %             | 3 %       |
|                                    | S.D.A. Park                     | 0 %                        | -3 %      | 0 %             | 1 %       | 0 %                       | -3 %      | 0 %             | 2 %       |
|                                    | <b>Mean absolute difference</b> | <b>3 %</b>                 |           | <b>2 %</b>      |           | <b>2 %</b>                |           | <b>2 %</b>      |           |
| Marginal                           | AIIMS                           | 5 %                        | 6 %       | 4 %             | 3 %       | 0 %                       | 0 %       | 0 %             | -1 %      |
|                                    | Hiran Kudna                     | 6 %                        | 6 %       | 7 %             | 6 %       | 0 %                       | 0 %       | 0 %             | 0 %       |
|                                    | IITD                            | 6 %                        | 7 %       | 6 %             | 4 %       | 0 %                       | 1 %       | 0 %             | -1 %      |
|                                    | IITM                            | 5 %                        | 5 %       | 5 %             | 4 %       | 0 %                       | 0 %       | 0 %             | -1 %      |
|                                    | Kaushambi                       | 5 %                        | 5 %       | 5 %             | 4 %       | 5 %                       | 6 %       | 7 %             | 6 %       |
|                                    | MRU                             | 7 %                        | 9 %       | 4 %             | 2 %       | 7 %                       | 8 %       | 5 %             | 4 %       |
|                                    | Mayur Vihar                     | 0 %                        | 1 %       | 0 %             | -1 %      | 6 %                       | 7 %       | 4 %             | 3 %       |
|                                    | Naraina Vihar                   | 6 %                        | 7 %       | 6 %             | 5 %       | 0 %                       | 0 %       | 0 %             | -1 %      |
|                                    | New Friends Colony              | 0 %                        | 1 %       | 0 %             | -2 %      | 0 %                       | 1 %       | 0 %             | -1 %      |
|                                    | S.D.A. Park                     | 5 %                        | 6 %       | 4 %             | 3 %       | 7 %                       | 7 %       | 5 %             | 4 %       |
|                                    | <b>Mean absolute difference</b> | <b>1 %</b>                 |           | <b>1 %</b>      |           | <b>1 %</b>                |           | <b>1 %</b>      |           |
